# Supplementary material for: Integrative analysis for identification of key miRNA-mRNA regulatory axes in esophageal cancer and preliminary validation of the regulatory role of miR-15b-5p/BTG2 therein
Source: PeerJ. 2026 Jan 28;14:e20538. doi: 10.7717/peerj.20538 (PMC12860276; doi:10.7717/peerj.20538)
Supplement: Supplemental Information 7 [file peerj-14-20538-s007.xlsx]

## Sheet: Sheet1
Characteristics	Alive(N=109)	Dead(N=76)	Total(N=185)	pvalue	FDR
Gender				0.05	0.1
FEMALE	21(11.35%)	6(3.24%)	27(14.59%)
MALE	88(47.57%)	70(37.84%)	158(85.41%)
Histological_type				0.02	0.05
Esophagus Adenocarcinoma, NOS	44(23.78%)	45(24.32%)	89(48.11%)
Esophagus Squamous Cell Carcinoma	65(35.14%)	31(16.76%)	96(51.89%)
Pathologic_Stage				0.0055	0.03
Stage I	7(3.91%)	1(0.56%)	8(4.47%)
Stage IA	3(1.68%)	2(1.12%)	5(2.79%)
Stage IB	4(2.23%)	1(0.56%)	5(2.79%)
Stage II	1(0.56%)	0(0.0e+0%)	1(0.56%)
Stage IIA	38(21.23%)	11(6.15%)	49(27.37%)
Stage IIB	17(9.50%)	16(8.94%)	33(18.44%)
Stage III	13(7.26%)	14(7.82%)	27(15.08%)
Stage IIIA	13(7.26%)	6(3.35%)	19(10.61%)
Stage IIIB	3(1.68%)	6(3.35%)	9(5.03%)
Stage IIIC	3(1.68%)	4(2.23%)	7(3.91%)
Stage IV	2(1.12%)	8(4.47%)	10(5.59%)
Stage IVA	1(0.56%)	4(2.23%)	5(2.79%)
Stage IVB	0(0.0e+0%)	1(0.56%)	1(0.56%)
Pathologic_T				0.12	0.12
T1	16(8.65%)	13(7.03%)	29(15.68%)
T2	30(16.22%)	18(9.73%)	48(25.95%)
T3	61(32.97%)	38(20.54%)	99(53.51%)
T4	1(0.54%)	4(2.16%)	5(2.70%)
T4a	1(0.54%)	0(0.0e+0%)	1(0.54%)
TX	0(0.0e+0%)	3(1.62%)	3(1.62%)
Pathologic_N				0.0053	0.03
N0	57(30.81%)	19(10.27%)	76(41.08%)
N1	38(20.54%)	39(21.08%)	77(41.62%)
N2	5(2.70%)	7(3.78%)	12(6.49%)
N3	3(1.62%)	2(1.08%)	5(2.70%)
NX	6(3.24%)	9(4.86%)	15(8.11%)
Pathologic_M				0.01	0.05
M0	93(51.67%)	52(28.89%)	145(80.56%)
M1	2(1.11%)	7(3.89%)	9(5.00%)
M1a	1(0.56%)	5(2.78%)	6(3.33%)
M1b	0(0.0e+0%)	1(0.56%)	1(0.56%)
MX	12(6.67%)	7(3.89%)	19(10.56%)
Age
Mean±SD	62.19±12.09	62.83±11.67	62.45±11.89
Median[min-max]	61.00[36.00,86.00]	61.00[27.00,90.00]	61.00[27.00,90.00]
Weight
Mean±SD	71.82±15.37	79.67±22.38	75.04±18.91
Median[min-max]	67.00[47.00,127.00]	77.00[46.00,193.00]	72.00[46.00,193.00]
Height
Mean±SD	170.92±8.74	173.93±7.97	172.10±8.55
Median[min-max]	172.00[150.00,192.00]	174.00[152.00,197.00]	173.00[150.00,197.00]
BMI
Mean±SD	24.66±4.77	26.32±7.20	25.31±5.89
Median[min-max]	23.75[16.85,42.39]	25.10[13.40,60.24]	24.26[13.40,60.24]
OS
Mean±SD	561.57±506.90	490.54±449.74	532.39±484.24
Median[min-max]	402.00[4.00,3714.00]	364.50[0.0e+0,2134.00]	400.00[0.0e+0,3714.00]
