# Supplementary material for: Integrative analysis for identification of key miRNA-mRNA regulatory axes in esophageal cancer and preliminary validation of the regulatory role of miR-15b-5p/BTG2 therein
Source: PeerJ. 2026 Jan 28;14:e20538. doi: 10.7717/peerj.20538 (PMC12860276; doi:10.7717/peerj.20538)
Supplement: Supplemental Information 8 [file peerj-14-20538-s008.xlsx]

## Sheet: GeneSymbol
All targets
ABCA1
ABCB10
ABCB7
ABCD3
ACVR1
ADAM10
ADAM17
ADAMTS18
ADAMTS5
ADCY2
AGFG1
AGO4
AHDC1
AKAP1
ALCAM
AMMECR1
ANKRD13A
AP1G1
AQP11
ARFGEF1
ARFIP1
ARHGAP21
ARHGEF12
ARL6IP1
ARL8B
ARPP19
ARRDC3
ASPH
ATG4D
ATP2B4
ATP6AP2
ATP7A
ATP8A1
ATXN1
ATXN7L1
B4GALT5
B4GALT6
BACH2
BARHL2
BAZ2B
BCL2L2
BCL7B
BHLHE41
BICC1
BMP3
BRPF1
BTAF1
BTBD3
C12orf79
C15orf27
C16orf70
C18orf25
C1GALT1
C3orf58
C5orf30
C6orf62
C7orf60
C7orf71
CABP7
CALR
CAMK2A
CAMSAP2
CAND1
CANX
CASZ1
CAV2
CCDC144A
CCDC6
CCDC71
CCDC85A
CCT6A
CDC14A
CDC25B
CDH20
CDH7
CDK14
CDK19
CDK5R1
CDK6
CDK8
CDKN1B
CEBPG
CECR6
CEP55
CEP63
CERS5
CHD1
CHD7
CHMP4B
CHST1
CLCN6
CLVS2
CNOT7
CNTN4
COL2A1
COL4A1
COL6A3
CPT1A
CS
CSF1
CTSA
CTTNBP2NL
CUL5
CYB5R4
CYTH3
DCP2
DCUN1D4
DDAH1
DDX6
DEDD
DENND4C
DHRS13
DLG2
DLL4
DMPK
DMRTA2
DMXL1
DNAJB12
DNAJB4
DNMT1
DOCK6
DRGX
DSTYK
DUSP1
DUSP16
DYNLL2
DYRK1B
E2F3
E2F7
EFNB2
EGFR
EGR3
EIF4E3
ELAVL2
ELAVL4
EML6
EMX2
EOGT
ERBB3
ERLIN1
ERRFI1
ESCO1
ESR1
ESRRG
ETV3
EYA3
F3
FAM161A
FAM168B
FAM184A
FAM21A
FAM21C
FAM43A
FAM81A
FBN1
FBN3
FBXL19
FBXO28
FEZ2
FMR1
FNBP1L
FOSB
FOXF1
FOXK2
FXR1
GADD45A
GAP43
GAPVD1
GAS1
GDF6
GJD2
GLRX5
GMFB
GPATCH8
GPCPD1
GPM6A
GPR137C
GRID2
GTF2H1
H2AFY
HECW2
HIF1AN
HLA-DQB1
HLA-DQB2
HLF
HMGA2
HMGB3
HOMER1
HOXC8
HSP90B1
HSPA4L
IL6ST
INHBB
INO80
ITGA11
ITGA5
ITGA9
ITGB8
ITPK1
ITSN2
JARID2
JMY
JPH3
KAT7
KDM2B
KIAA0226
KIAA0232
KIAA1468
KIT
KLF4
KLF5
KLF6
KPNA1
KPNA4
LAMA4
LBR
LDLR
LIN28A
LIPA
LMAN1
LMTK2
LRCH1
LRFN1
LRP4
LRRC41
LTBP1
LYRM2
LYSMD2
MAF
MAF1
MAFB
MAFG
MAP2K1
MAP3K4
MAP3K9
MARCH2
MARCH3
MBOAT2
MCM3AP
MDFIC
MDM4
MED12L
MEOX2
MIER1
MITF
MLEC
MLLT10
MMD
MMP15
MMS19
MNT
MOB1B
MOSPD1
MPPED2
MRAS
MTF1
MTMR1
MTMR10
MTMR12
MTMR14
MTMR9
MTSS1L
MUM1L1
MXD1
MYBL1
NAA15
NAP1L1
NAT14
NCEH1
NCKIPSD
NDP
NEURL4
NEUROD1
NHS
NOG
NOL4
NOVA1
NPEPL1
NPTN
NPTX1
NR2C2AP
NR2E1
NRARP
NRAS
NRP1
ORMDL1
OSBPL11
OSTF1
OTUD4
OTX2
PAG1
PAN3
PAPD4
PAQR9
PBXIP1
PCYT1B
PDE4B
PDE5A
PDE7A
PDIA3
PDK4
PHACTR2
PHAX
PI4KA
PIK3C2A
PIK3CA
PIK3R3
PITPNM2
PLAA
PNPLA2
PNPLA6
PNRC2
POU3F2
PPAP2B
PPARD
PPARGC1A
PPFIA2
PPP1CB
PPP1R10
PPP1R12A
PPP6R1
PRDM15
PRICKLE2
PRKAA1
PRKAG2
PRNP
PRR15
PRRG1
PSEN1
PTEN
PTGES3
PTPN14
PTPRA
PTPRM
QKI
RAB12
RAB24
RAB34
RAB39B
RALBP1
RALY
RASAL1
RASSF8
RBM24
RGMA
RLIM
RNF219
RNF38
RNPEPL1
ROBO1
ROBO2
ROCK1
RPS6KA5
RSBN1L
RTN4
S1PR1
SBF2
SECISBP2L
SESN2
SESTD1
SFMBT1
SGMS1
SH2B3
SIK1
SIRT7
SKIDA1
SKP1
SLC13A2
SLC16A6
SLC25A44
SLC2A1
SLC7A5
SMIM12
SMS
SNAP91
SNN
SNX2
SNX27
SNX3
SOCS3
SOS1
SOS2
SOX5
SPIRE1
SPRYD7
SRPK2
SRSF11
SSR1
ST18
ST8SIA3
STARD13
STK38L
STOX2
STRADB
STT3A
STX11
STX3
STX6
SULF1
SYNJ1
SZRD1
TAF4
TAF4B
TANC1
TBC1D5
TBC1D8
TBPL1
TCF4
TEK
TERF2
TET2
TFRC
TGFA
TGFB2
TIGD5
TMED7
TMEM170A
TMEM52B
TMEM54
TMEM63B
TMEM9B
TMSB10
TMSB4X
TNFRSF1B
TNRC6A
TNRC6C
TRAK2
TRPS1
TSPAN18
UBA6
UBAP2L
UBE2D1
UBE2D3
UBE2W
UBE4B
UBXN1
UCP3
UGT8
ULK3
UNC79
USP33
USP38
USP4
USP47
USP48
USP6
VASH2
VMP1
VSNL1
WASL
WDR20
WDR47
WNT10B
XPO4
YPEL3
YTHDC2
ZBED4
ZBTB18
ZBTB8A
ZC3H12C
ZCCHC2
ZDHHC17
ZDHHC23
ZDHHC7
ZFPM2
ZNF217
ZNF274
ZNF618
ZNF784
ZNF804A
ZNF821
ZNRF1
AEBP2
AKIRIN2
AP1S2
APLP2
ARX
ASF1A
ASXL3
ATL2
ATP5G3
AZIN1
BMPR1A
CAMK2D
CCT5
CSRNP2
DDIT4
DENR
DNAJC5
DPY30
EBF1
EIF4G2
ELOVL5
EMP2
ERN1
FAM76B
FOS
FYB
GABRA1
GALNT3
GDE1
GDF10
GDI2
GOT2
GPR37
H2AFV
HOXB2
HTR7
IDE
IQCJ-SCHIP1
JDP2
JUN
KBTBD2
KIF13A
KLHL23
LCOR
LMO4
LRCH2
LRFN5
LRRN3
MARCH7
MEIS2
MORN4
MYCBP
NDRG2
NDRG4
NME7
NR5A2
PCDH10
PDE3A
PDE4A
PDE4D
PFDN6
PGGT1B
PIEZO1
PITPNA
PMP22
PPP2CA
PRKD3
PRPF4B
PSPH
PTPRU
PVRL3
RASGEF1B
REV1
RNF11
SCAPER
SCHIP1
SETD8
SLC25A3
SRSF4
SSX2IP
SYT14
TBX1
TFEC
TGIF1
TMED10
TMEM132D
TMF1
TMPO
TOP1
TOX
TPD52
TSPAN3
UBE2F
YWHAG
ZBTB34
ZC3H12A
ZFAND3
AAED1
ACADL
ADD3
AGBL4
AK4
ALPL
ANGPT1
ANKRD13C
AP1S1
AP2A2
AP3M1
ARHGAP10
ARHGAP29
ATF2
ATP13A4
B3GNT5
BCL2
BIN1
C10orf11
C16orf72
C21orf33
C9orf72
CA11
CACNG2
CAMK1
CBFB
CCDC158
CCDC40
CCND2
CCNT2
CCNY
CDH4
CHD5
CHN2
CHP1
CHST9
CLIP4
COL5A3
COX5A
CTNNBIP1
DCUN1D3
DEDD2
DHH
DMTF1
DNAJC13
DNM2
DPF1
DR1
DRAP1
DVL3
EDEM1
EFEMP2
EFNB3
ELAVL3
ELOVL6
EPHA5
EPHA7
EPHB2
EPHB6
EZR
FAM160A2
FAM175B
FAM46A
FBN2
FGF20
FJX1
FNIP1
FOXC1
FRS2
GCNT2
GPR50
HAPLN1
HAS2
HCAR2
HCAR3
HELLS
HGSNAT
HHEX
HMX1
HSD17B2
HSPH1
IPO8
ISM1
JAK2
JRKL
KCNK9
KHDRBS3
KXD1
LAMP1
LEPROT
LMOD3
LRRC8D
LSM5
MANEAL
MAP1LC3B
MAPRE2
MCCD1
MLLT3
MMGT1
MRPS17
MTMR6
MTMR7
MYO10
NBEA
NCKAP1L
NCOA7
NDRG3
NEUROG2
NR3C2
NR4A2
NRBF2
NXPH4
PHOX2B
PIK3CB
PPM1K
PPP3R1
PRR11
PRR15L
PRRX1
PSME1
RAB22A
REEP1
RHOBTB1
RHOT1
RIMS2
RNF170
RNF217
RRAGC
RSPO3
RSPO4
RTKN2
SAMD5
SASS6
SCRT2
SDHAF1
SDHD
SEC61A2
SERINC3
SETBP1
SF3B1
SFXN2
SGIP1
SIRT1
SLA2
SLC25A24
SLC25A35
SLC37A3
SLC39A11
SLC43A1
SMIM10
SMIM13
SMOC1
SOWAHC
SOX11
SOX4
SPARC
SRP19
SSR3
SSRP1
ST7
STX12
TCF12
TFAM
TGFBR2
TMBIM1
TMEM178B
TMEM218
TMEM64
TOMM70A
TOX3
TPM3
TPRG1L
TPT1
TRIM41
TTYH1
UFD1L
VAX2
VEZT
VHL
VWA8
WHSC1L1
XKR9
YARS
YWHAZ
ZBTB7C
ZCCHC24
ZDHHC14
ZFP91
ZNF521
ZNF629
ZNF638
AURKA
CACNA1H
CD63
COMMD10
COPS5
CPM
CREBZF
ERGIC3
FAM104A
FKBP14
GABRB1
GATC
GTDC1
HNRNPA1
HNRNPA2B1
IL1RAP
ITSN1
KCNK7
MAP7
MDGA2
PCBP1
PCBP2
PCDH17
PGBD5
PLAGL1
PPCDC
PPME1
PPP4R2
PROSC
PRPF38A
RAB11FIP1
RAB14
RBM12
RNPS1
RPRD1A
RSRC2
SHANK2
SLC6A6
SMIM3
SOWAHB
SP5
TMOD3
TNKS2
UBA2
VDAC1
ABHD6
ABI3BP
ABL1
ACTC1
ACTN1
ACTR3C
ADAM12
ADAM19
ADAM22
ADAM9
ADO
ADRA1D
ADRA2A
AKAP10
AMOTL2
ANKRA2
ANKRD17
ANKS4B
AP2A1
AP3S1
ARF4
ARID4A
ARL15
ARL4A
ARL6IP6
ASB3
ATF1
ATG5
BCL2L11
BCOR
BECN1
BEND7
BNC1
BTBD10
C10orf25
C4orf19
C7orf43
C8orf4
CA10
CACHD1
CALB2
CALCR
CALU
CAMK2N1
CAMK2N2
CAPN5
CAPZA1
CARF
CARS
CAT
CBX2
CBX3
CCDC117
CCDC148
CCDC178
CCDC43
CCDC71L
CCNE2
CCNK
CDC37L1
CDCA7
CELF3
CELF4
CEP76
CFDP1
CFL2
CHL1
CHST2
COL13A1
COL25A1
COL9A3
CPNE8
CPOX
CSAD
CSNK1A1
CTHRC1
CUL2
CYB561
CYP24A1
CYSLTR1
CYYR1
DBF4
DCBLD1
DESI2
DEXI
DGKZ
DIP2B
DLGAP1
DLGAP2
DNAJC25
DNAJC25-GNG10
DNMT3A
DOC2A
DOCK7
DOLPP1
DRD1
EAF1
EDEM3
EDNRA
EED
EFR3A
ELMOD2
ENTHD2
EPB41
EPC1
EPC2
EPG5
ERG
EVX2
EXTL2
FAM109B
FAM110B
FAM133A
FAM13C
FAM214A
FAM49A
FAM73B
FAM91A1
FANCF
FAP
FBXL14
FBXO45
FKBP3
FOSL2
FOXB1
FOXD1
FOXG1
FRZB
FUCA1
GABRA5
GALNT1
GALNT7
GALR1
GATA5
GATM
GCLC
GFPT2
GJA1
GLCCI1
GLDC
GLUD1
GLUD2
GMNC
GNA13
GNAI2
GNAO1
GNG10
GNPDA1
GOLGA1
GOLGA4
GPR150
GPR75-ASB3
GRAMD2
GRB10
GRIA2
GSKIP
HEPHL1
HIVEP1
HLX
HOXA1
HOXA11
HOXB8
HTRA3
IDH1
IER5
IL1RAPL2
ING5
INO80D
INSIG2
IP6K3
IQCG
IRX4
ITGA4
ITGA6
ITGA8
JAK1
JAKMIP2
JPH4
KCNA4
KCTD8
KDM3A
KIAA0101
KIAA0226L
KIAA2026
KLF10
KLF11
KLHL20
KMT2C
LARGE
LCLAT1
LGI1
LHX5
LHX8
LHX9
LIN28B
LIN7C
LMBR1L
LRFN2
LRRC17
LSM14B
LYN
LYSMD3
MAB21L1
MAML1
MAN1A2
MAP3K12
MAP3K5
MBNL3
MBOAT1
MBTPS2
METAP2
MEX3B
MFSD11
MIA3
MICAL1
MINOS1
MINPP1
MKRN3
MSANTD3-TMEFF1
MSANTD4
MTDH
MYBL2
MZT1
NAALADL2
NAGPA
NDEL1
NECAP1
NEFM
NEUROD6
NHLH2
NKAIN2
NKX2-2
NRBP1
NRXN3
NUS1
OMG
ORC2
OVOL1
OXR1
P4HA1
P4HA2
PAAF1
PARP16
PBRM1
PCDH20
PCGF5
PDCD10
PDCL
PDSS1
PEX5L
PFN2
PGM1
PGM3
PGP
PI4K2B
PICALM
PIGA
PIGX
PIP4K2A
PIP4K2B
POLE3
POLR3G
PON2
POP1
PPID
PPIL3
PPP1R14C
PPP3CA
PPTC7
PRDM1
PRKRIR
PRPF40A
PSEN2
PSMD7
PTP4A1
PTPN13
R3HDM1
RAB15
RAB27B
RAB32
RAB38
RAB4B
RAB7A
RAB8A
RABGAP1L
RAD23B
RALGDS
RANBP9
RAP1B
RAP2B
RAPGEF4
RARB
RARG
RASA1
RASD1
RASEF
RCBTB1
REEP3
RFTN2
RFX2
RFX6
RHEBL1
RNF122
RNF157
RNF220
RNF34
RRAD
RTCB
RTN4R
RUNDC3B
RUNX2
RWDD4
SCAF4
SCN1A
SCN9A
SCYL3
SDAD1
SEC22C
SEC23A
SEMA3A
SEMA6B
SEPT7
SETD3
SH3RF1
SHOC2
SIX1
SIX4
SKP2
SLC22A5
SLC25A34
SLC29A3
SLC35A5
SLC35B4
SLC35D3
SLC35F1
SLC35F4
SLC41A2
SLC5A11
SLC6A9
SLC7A10
SMAD1
SMAP1
SMIM14
SNAI1
SNAPIN
SNX10
SNX16
SOCS1
SOCS6
SOX9
SPHKAP
SRSF7
STAC
STK39
STRIP1
STX2
SUCLG2
SURF4
SYNGR3
TASP1
TBC1D10B
TCF7
TEX2
TFDP1
TIA1
TMCC1
TMED2
TMEFF1
TMEM106B
TMEM121
TMEM170B
TMEM181
TMEM229A
TMEM87A
TMTC3
TRAF3IP2
TRIM23
TRO
TRPM7
TTC39A
TTLL7
TTPA
TUSC3
TVP23B
TWF1
TXNDC5
UBAC1
UBE2D2
UBE2I
UBE2J1
UBE2V2
UBE3C
USP2
USP45
VAPA
VAT1L
VIM
VIP
VKORC1L1
VOPP1
VPS26B
WDR44
WDR82
WWP1
YBX1
YOD1
YPEL2
YPEL5
YTHDC1
ZBTB11
ZDHHC21
ZFAND5
ZFC3H1
ZNF200
ZNF280B
ZNF382
ZNF608
ZNF711
ZPBP2
ABCA3
ABCD2
ABHD15
ACAN
ADCY6
ADRA2B
AFAP1
AFAP1L2
AFTPH
AGRP
AKAP9
ALDH5A1
ANGPTL4
ANKEF1
ANKRD12
ANKRD28
ANKRD44
ANKRD46
AOX1
AP1AR
AP1B1
AP2M1
AP4E1
APPL2
AQP1
ARFIP2
ARHGAP12
ARHGAP9
ARHGEF2
ARL3
ARL6
ARPC5
ARPP21
ASH1L
ATOH8
ATOX1
AVL9
B3GALNT1
B3GNT2
B3GNT9
B4GALT2
BACH1
BCL2L1
BCORL1
BEST3
C10orf113
C12orf43
C17orf53
C1QL1
C20orf194
CACNG4
CACUL1
CAMK2G
CAMKK2
CAP1
CAPN15
CASC3
CBLN2
CCDC176
CCSER1
CD300LB
CDC42
CDCA8
CDIP1
CDK13
CDKN2AIP
CDR2L
CELF1
CELF6
CEP85L
CERS2
CETN3
CHCHD6
CKAP4
CLTA
CLTC
CMPK1
CMTM6
CNN2
CNNM4
CNTNAP1
COL8A1
CORO1C
CPNE3
CREB5
CRK
CRTAM
CSF2
CTBP2
CTGF
CTNND1
CTSV
CTTNBP2
DAAM2
DAPK2
DCLRE1A
DCP1A
DDX17
DDX3Y
DERL2
DLG5
DLGAP3
DLST
DNAJB6
DOCK8
DSN1
DYNC1LI2
EEF1A1
EFEMP1
EFHD2
EFNA4
EHD2
EIF3J
EIF4A1
EIF5A
ELAVL1
ELF2
ELF3
ELFN1
ELOVL1
ENC1
ENPEP
ENPP5
ENTPD7
ERMP1
ETF1
EXD2
EYA1
FAF2
FAM117B
FAM118A
FAM134B
FAM13A
FAM156A
FAM160B1
FAM180A
FAM193B
FAM19A5
FAM43B
FAM57A
FBXL2
FBXL20
FBXO27
FBXW11
FGF1
FGFR1
FKBP2
FKBP5
FLOT2
FLVCR1
FOXL2
FOXP4
FOXQ1
FSCN1
FTL
FURIN
G6PD
GABARAPL1
GABPB2
GALNT6
GANAB
GARNL3
GCH1
GDI1
GDNF
GEMIN6
GLI3
GLRA2
GNAI3
GPR161
GPR173
GRM5
GRM7
GXYLT1
GZF1
HMBOX1
HOXD1
HPCAL4
HS2ST1
HS3ST5
HSPA13
IFIT2
IFNAR1
INSR
IP6K1
IQGAP2
KAT2A
KCND3
KCNMB2
KCTD15
KCTD20
KIAA0040
KIAA0430
KIAA1429
KIF3C
KIRREL
KLF7
KLHDC10
KLHL11
KLHL2
KLHL24
KLHL42
KLHL9
KPNA6
LAMB3
LANCL2
LASP1
LDLRAP1
LDOC1
LDOC1L
LETMD1
LHFP
LMOD1
LOXL4
LPGAT1
LPIN2
LRRC7
LUZP1
LZTS2
MAML3
MAP3K2
MARCH9
MECOM
MEIS1
METTL21B
MINK1
MLXIP
MMP14
MPHOSPH9
MRC2
MRFAP1
MSN
MTMR4
MYCBP2
MYH9
MYRF
NAA40
NAGS
NCAM2
NCKAP5L
NDRG1
NECAP2
NELFA
NIPA2
NKX6-3
NME1
NNAT
NPTXR
NRIP3
NTNG1
NUMA1
NUP160
ODC1
ORAI2
OSBPL8
OTX1
P2RX5
PACSIN1
PALD1
PAOX
PAPPA
PAPSS1
PAX2
PAX7
PCDHGA1
PCDHGA10
PCDHGA11
PCDHGA12
PCDHGA2
PCDHGA3
PCDHGA4
PCDHGA5
PCDHGA6
PCDHGA7
PCDHGA8
PCDHGA9
PCDHGB1
PCDHGB2
PCDHGB3
PCDHGB4
PCDHGB6
PCDHGB7
PCDHGC3
PCDHGC4
PCDHGC5
PDE1C
PDE6D
PDE8B
PDIK1L
PDZD3
PFAS
PFKFB3
PGLS
PIKFYVE
PITPNB
PLCL2
PLEKHA3
PLK3
POU4F1
POU6F2
PPFIA3
PPP1R9B
PPP2CB
PPP2R2D
PPP2R5D
PPP6R3
PRDM16
PRDM6
PREX1
PRKAB1
PRKCB
PROX2
PRRT2
PTBP1
PTBP2
PTH1R
PTPN22
PTPRD
PTPRK
PTPRZ1
PURB
PWWP2B
QPCTL
RAB11FIP4
RAB3IP
RAP2C
RAPGEF6
RAPH1
RAVER1
RB1CC1
RBBP4
RBM23
RBMX
RBMXL1
RBPJ
RCE1
RCL1
RDH12
RFC1
RFFL
RIMS1
RNF44
RPL17-C18orf32
RRAGD
RUNX1T1
RWDD2A
SACM1L
SASH1
SCN2B
SCOC
SEC61B
SENP1
SEPHS2
SERTAD2
SESN1
SF3B4
SFMBT2
SFXN5
SGK1
SGMS2
SGPP1
SGTB
SH3GL1
SH3GL2
SHISA5
SHISA9
SIMC1
SLC25A25
SLC25A36
SLC25A39
SLC2A12
SLC30A5
SLC30A7
SLC35F5
SLC39A1
SLC39A7
SLC41A1
SLC46A1
SLC4A1
SLC50A1
SLC6A1
SLC7A2
SLC7A8
SLC8A2
SLMO2
SMARCD1
SNRK
SNX15
SNX17
SNX18
SNX30
SOBP
SOCS2
SOCS5
SOGA1
SOGA3
SP3
SPOCD1
SPPL3
SPRN
SREK1
SRRM4
SRSF2
STAM
STK3
STOM
STX5
STXBP6
SUMO1
SUPT16H
SV2A
SVOP
SYDE1
SYNRG
SYT1
SYT2
TAGLN2
TBC1D13
TENM1
TFAP2A
TFAP2D
TFE3
TFG
TGFBR1
TGIF2
THNSL1
THRAP3
THUMPD3
TIMM17A
TK2
TM9SF3
TMEM110
TMEM158
TMEM167A
TMEM184B
TMEM2
TMEM200B
TMEM57
TNFRSF10B
TNNI1
TOR2A
TPI1
TPM4
TRAM1
TRAM2
TRIM44
TRIM56
TRIQK
TRPC3
TRPM4
TTPAL
TTYH3
TUBB1
TXLNA
UBE2K
UBE2Q1
UBFD1
UBXN7
UNC13A
VAMP2
VAPB
VAT1
VAV3
VCP
VEGFC
VKORC1
VPS54
WASF2
XXYLT1
YES1
ZBTB5
ZC3H10
ZC3H11A
ZC3H7A
ZIC3
ZNF131
ZNF280C
ZNF322
ZNF354A
ZNF385A
ZNF436
ZNF462
ZNF710
ZNF740
ABCE1
ACTR3B
ACVR1B
ADARB2
ADCYAP1
ALPK1
ANGPT2
ANGPTL2
ANKRD40
ANKRD55
ANO4
ANP32E
ANXA7
AP1G2
APC
APLF
APMAP
ARC
AREL1
ARHGAP11A
ARHGAP6
ARHGEF4
ARHGEF6
ARL9
ARNTL
ATP1B1
ATP6V1C2
BCAT1
BMPER
BNIP2
BZW2
C14orf166
C16orf52
C18orf54
C1orf198
C3orf80
C6orf106
C6orf120
CACNA1D
CADM3
CADM4
CAMK1G
CAP2
CCDC170
CCNG2
CCSAP
CHST11
CHSY1
CNDP1
CNEP1R1
CNIH1
CPLX1
CPLX2
CSMD1
CSNK1G2
CXCL12
DEPDC1
DGKH
DHODH
DIP2C
DIRC2
DNAJC16
DNAJC27
DNAJC9
DRAM2
DUSP5
EIF5A2
ELK3
ELOVL2
EMP1
ENTPD1
ENTPD4
ERGIC2
ERI2
ESRRA
EVI5
FAM71F1
FAXC
FCHO2
FERMT2
FGF11
FKBP1A
FOXN2
FOXN3
FOXO1
FRK
FRMPD4
GABRB2
GATA3
GDPD1
GGNBP2
GHR
GK5
GNG3
GPR180
GPR3
GRIN2B
GRK5
GULP1
HCN1
HCN2
HIF1A
HMG20A
HMGXB3
HOXA10
HPS5
HSPE1-MOB4
INHBA
INTS2
ITGAV
KAT6B
KCNAB3
KCNB1
KCND1
KCNN3
KCTD1
KDM1B
KIAA1033
KIF3B
KLHL15
KLHL28
LANCL1
LATS2
LDB2
LMBRD2
LONRF1
LRP11
LRRFIP1
LYPLA1
LZTS1
MAN1A1
MAN2A1
MAPK10
MBNL1
MEF2A
MEF2C
MFHAS1
MMP11
MOB4
MSL2
MTRF1
MTUS1
MYEF2
MYO1C
MYOCD
MYPOP
NAMPT
NCLN
NCOA2
NDFIP2
NEGR1
NET1
NFATC2IP
NRSN1
NT5C1A
NUCKS1
NUDT4
NXT2
PAK7
PANK1
PCDH9
PCMTD2
PCNXL2
PCP4L1
PDE7B
PDHX
PDP1
PELI2
PEX7
PHLDB2
PHOSPHO1
PIGH
PIK3R2
PIM2
PLCG1
POU2F3
PPM1E
PPP1CC
PPP1R12C
PPP2R5C
PSIP1
PTK2
RAB33B
RAP1GDS1
RAP2A
RARA
RASAL2
RAVER2
RBAK
RBX1
RGL1
RNF138
RNF24
RNF43
ROCK2
RPS6KB1
SCML2
SCUBE3
SDCBP
SEC14L1
SEC62
SETD7
SFRP4
SHISA7
SIAH1
SKOR1
SLC24A2
SLC30A4
SLC35A1
SLC39A13
SLC5A7
SLC6A5
SLC9A9
SMAD5
SNTA1
SNTB2
SNX12
SP9
SQSTM1
SRSF3
SSR2
ST6GAL2
STIM2
STMN4
SUV420H2
SYNGAP1
SYT3
SYTL5
TADA1
TBC1D4
TBK1
TBX4
TCF7L2
TET3
TEX30
THRB
TLDC1
TMED5
TMEM156
TMEM168
TMEM236
TMEM237
TMEM70
TNPO1
TOPORS
TRAPPC8
TRPC1
TRPC6
TSEN54
TTC14
UBE2N
UBOX5
USP13
VLDLR
VPS37C
VPS4A
WAPAL
WDR45B
WNT3
WSCD2
YBX2
ZBTB46
ZCCHC14
ZDHHC13
ZDHHC6
ZKSCAN1
ZNF135
ZNF143
ZNF182
ZNF225
ZNF236
ZNF275
ZNF286A
ZNF286B
ZNF292
ZNF302
ZNF385B
ZNF648
ZNF654
ZNF831
ZRANB2
ZSWIM4
AMBN
ARF6
ATP5A1
C15orf48
CXXC5
DDR2
DPP8
EIF2AK2
FUBP3
[truncated: 2,441 more rows]

## Sheet: Detail
Dataset: New Set( ID type: miRNA Product, Count: 69)
Targets found: 4440
miRNA Product	Target genes
hsa-miR-29b-2-5p	-
hsa-miR-550a-3p	-
hsa-miR-148a-3p	ABCA1; ABCB10; ABCB7; ABCD3; ACVR1; ADAM10; ADAM17; ADAMTS18; ADAMTS5; ADCY2; AGFG1; AGO4; AHDC1; AKAP1; ALCAM; AMMECR1; ANKRD13A; AP1G1; AQP11; ARFGEF1; ARFIP1; ARHGAP21; ARHGEF12; ARL6IP1; ARL8B; ARPP19; ARRDC3; ASPH; ATG4D; ATP2B4; ATP6AP2; ATP7A; ATP8A1; ATXN1; ATXN7L1; B4GALT5; B4GALT6; BACH2; BARHL2; BAZ2B; BCL2L2; BCL7B; BHLHE41; BICC1; BMP3; BRPF1; BTAF1; BTBD3; C12orf79; C15orf27; C16orf…
hsa-miR-139-5p	AEBP2; AKIRIN2; AP1S2; APLP2; ARX; ASF1A; ASXL3; ATG4D; ATL2; ATP5G3; AZIN1; BAZ2B; BMPR1A; CAMK2D; CCT5; CDH20; CSRNP2; DDIT4; DENR; DNAJC5; DPY30; EBF1; EIF4G2; ELOVL5; EMP2; ERN1; FAM76B; FBXO28; FMR1; FOS; FYB; GABRA1; GALNT3; GDE1; GDF10; GDI2; GOT2; GPR37; H2AFV; HOXB2; HTR7; IDE; IQCJ-SCHIP1; JDP2; JUN; KBTBD2; KIF13A; KLHL23; KPNA4; LCOR; LMO4; LRCH2; LRFN5; LRRN3; MARCH7; MEIS2; MORN4; M…
hsa-miR-204-5p	AAED1; ACADL; ADD3; AGBL4; AK4; AKAP1; ALPL; ANGPT1; ANKRD13A; ANKRD13C; AP1S1; AP1S2; AP2A2; AP3M1; ARHGAP10; ARHGAP29; ARX; ATF2; ATP13A4; B3GNT5; BCL2; BIN1; BMPR1A; C10orf11; C16orf72; C21orf33; C9orf72; CA11; CACNG2; CAMK1; CBFB; CCDC158; CCDC40; CCDC6; CCND2; CCNT2; CCNY; CDH4; CHD5; CHN2; CHP1; CHST9; CLIP4; COL5A3; COX5A; CSRNP2; CTNNBIP1; DCUN1D3; DEDD2; DHH; DMTF1; DNAJB4; DNAJC13; DNM2…
hsa-miR-490-3p	AKIRIN2; AP1S1; AURKA; CACNA1H; CAND1; CD63; COMMD10; COPS5; CPM; CREBZF; EOGT; ERGIC3; FAM104A; FKBP14; GABRB1; GATC; GTDC1; HMGA2; HNRNPA1; HNRNPA2B1; IL1RAP; ITSN1; KCNK7; MAP7; MDGA2; PCBP1; PCBP2; PCDH17; PGBD5; PLAGL1; PPCDC; PPME1; PPP4R2; PROSC; PRPF38A; RAB11FIP1; RAB14; RBM12; RNPS1; RPRD1A; RSRC2; SHANK2; SLC6A6; SMIM3; SOWAHB; SP5; STT3A; TMOD3; TNKS2; UBA2; VDAC1;
hsa-miR-30c-5p	ABHD6; ABI3BP; ABL1; ACTC1; ACTN1; ACTR3C; ACVR1; ADAM12; ADAM19; ADAM22; ADAM9; ADO; ADRA1D; ADRA2A; AKAP10; AMOTL2; ANKRA2; ANKRD17; ANKS4B; AP2A1; AP3S1; ARF4; ARID4A; ARL15; ARL4A; ARL6IP6; ASB3; ATF1; ATG5; ATL2; ATP8A1; AZIN1; B3GNT5; B4GALT6; BCL2L11; BCOR; BECN1; BEND7; BNC1; BTBD10; C10orf11; C10orf25; C4orf19; C7orf43; C8orf4; C9orf72; CA10; CACHD1; CALB2; CALCR; CALU; CAMK2D; CAMK2N1; …
hsa-miR-133a-3p	ABCA3; ABCD2; ABHD15; ACAN; ADAM12; ADCY6; ADRA2B; AFAP1; AFAP1L2; AFTPH; AGRP; AKAP10; AKAP9; ALDH5A1; ANGPTL4; ANKEF1; ANKRD12; ANKRD28; ANKRD44; ANKRD46; AOX1; AP1AR; AP1B1; AP2M1; AP4E1; APPL2; AQP1; ARFIP2; ARHGAP12; ARHGAP9; ARHGEF2; ARL3; ARL6; ARPC5; ARPP21; ASH1L; ATOH8; ATOX1; ATP6AP2; AVL9; AZIN1; B3GALNT1; B3GNT2; B3GNT9; B4GALT2; BACH1; BCL2L1; BCL2L2; BCORL1; BEST3; BICC1; BTBD3; C1…
hsa-miR-135a-5p	ABCE1; ACTR3B; ACVR1B; ADARB2; ADCYAP1; ADO; ADRA2A; AEBP2; ALPK1; ANGPT2; ANGPTL2; ANKRD40; ANKRD55; ANO4; ANP32E; ANXA7; AP1G2; APC; APLF; APMAP; ARC; AREL1; ARHGAP11A; ARHGAP6; ARHGEF2; ARHGEF4; ARHGEF6; ARL9; ARNTL; ASPH; ATP1B1; ATP6V1C2; B4GALT5; BACH1; BCAT1; BMPER; BMPR1A; BNIP2; BTBD10; BZW2; C14orf166; C16orf52; C18orf54; C1orf198; C3orf80; C6orf106; C6orf120; CACNA1D; CADM3; CADM4; CAM…
hsa-miR-28-3p	AMBN; ARF6; ATP5A1; C15orf48; CXXC5; DDR2; DPP8; DYNLL2; EIF2AK2; FAM168B; FUBP3; GPR85; HSPBAP1; LUZP2; MED13; PAPOLA; PARP8; PASD1; PRPF19; PRR14; RAB33B; RBMS1; RNF168; RNF182; RSPO3; SLC26A3; STXBP4; TBC1D19; TMEM167B; WASL; ZNF608;
hsa-miR-153-3p	ACTN4; ACVR1B; ADAM19; ADAMTS8; ADD1; ADO; AKAP6; ANGPT1; ANK1; ANKRD10; APBB2; APC; APP; ARF1; ARHGEF40; ARID1A; ARL4A; ARNTL; ASB7; ATG5; ATP2C1; ATP8A1; AUTS2; AZIN1; B4GALT1; BMPR2; BRMS1L; C16orf52; C2CD2; C6orf120; C6orf62; C8orf44-SGK3; C9orf40; CADM2; CALN1; CAMKK2; CANX; CAP1; CAPN15; CASK; CBFB; CCNJ; CCSAP; CDK13; CELF6; CFL2; CIB2; CIC; CITED2; CKAP4; CLASP2; CLMP; CNN3; CSNK1A1; CTDS…
hsa-miR-30a-5p	ABHD6; ABI3BP; ABL1; ACTC1; ACTN1; ACTR3C; ACVR1; ADAM19; ADAM22; ADAM9; ADO; ADRA1D; ADRA2A; AMOTL2; ANKRA2; ANKRD17; ANO4; AP2A1; AP3S1; ARF4; ARID4A; ARL15; ARL4A; ARL6IP6; ASB3; ATG5; ATL2; ATP8A1; AZIN1; B3GNT5; B4GALT6; BCL2L11; BCOR; BECN1; BEND7; BNC1; BTBD10; C10orf11; C10orf25; C4orf19; C7orf43; C8orf4; C8orf44-SGK3; C9orf72; CA10; CACHD1; CALB2; CALCR; CALU; CAMK2D; CAMK2N1; CAMK2N2; C…
hsa-miR-21-5p	ACVR1C; AIM1L; ALX1; AP1AR; ARHGAP24; ARHGEF12; ARMCX1; ASF1A; BCL7A; BEST3; C10orf12; CASKIN1; CCL1; CCL22; CCR7; CD69; CHIC1; CNOT8; CNTFR; CPEB3; CSRNP3; DCAF7; DMRTC1B; DUSP8; ELF2; ERG; FAM13A; FASLG; FBXO11; FGF18; GABRB2; GLCCI1; GLIS2; GRAMD3; HRK; IL12A; JAG1; KBTBD6; KBTBD7; KLF5; KLHL42; KRIT1; LANCL1; LEMD3; LIFR; LRRC57; MAP2K3; MAP3K1; MAPK10; MARCH5; MATN2; MBLAC2; MRPL49; MSH2; MS…
hsa-miR-29c-3p	AAR2; ABCB6; ABCE1; ABHD4; ADA; ADAMTS10; ADAMTS17; ADAMTS18; ADAMTS2; ADAMTS7; ADAMTS9; AGPAT4; AHR; AIM1; AKAP13; AKAP5; AKT3; ALS2; AMER1; AMFR; AMMECR1; AMMECR1L; AMOT; ANKRD13B; ANKRD27; ANKRD52; AP1S1; AP4E1; ARF5; ARL4A; ARRDC3; ARRDC4; ARVCF; ASXL3; ATAD2B; ATG9A; ATP2B4; B3GNT5; BACH2; BAK1; BAX; BBC3; BCL2L2; BDKRB2; BEAN1; BLMH; BMF; BMP1; BRWD3; BSND; BTG2; C11orf57; C11orf87; C16orf7…
hsa-miR-145-5p	AARS; ABCE1; ABHD17B; ABHD17C; ABRACL; ACTB; ACTG1; ACTR3; ADAM17; ADD3; ADPGK; AKAP9; ALKBH1; ANGPT2; ANKRD28; AP2B1; AP3S1; APPL1; ARF6; ARHGAP24; ARHGAP6; ARL11; ARL5B; ARPC5; ATF1; ATP6V0B; ATXN2; BACH2; BCR; BIRC2; BLOC1S2; BLOC1S6; BRI3BP; BTF3L4; BTG1; C5orf15; C7orf73; CABLES1; CABP1; CACHD1; CACNA1D; CAMK2D; CASZ1; CAV2; CCDC107; CCDC25; CCDC62; CCDC73; CCNL1; CCZ1; CCZ1B; CD40; CFTR; CH…
hsa-miR-93-5p	ABHD5; ACER2; ADAM9; AEN; AGFG2; AHNAK; AKTIP; AMER2; ANKRD13C; ANKRD50; ANKRD9; ANO6; APCDD1; APP; ARAP2; ARHGAP1; ARHGAP12; ARHGEF10; ARHGEF28; ARHGEF3; ARID4A; ARID4B; ARL4C; ATAD2; ATE1; ATG16L1; ATG2B; B3GALT2; B4GALT6; BAHD1; BAMBI; BMPR2; BRMS1L; BTBD10; BTBD7; BTG3; BVES; C10orf107; C11orf30; C16orf52; C2orf69; C6orf120; C7orf43; C7orf60; CALD1; CAMK2N1; CAMK2N2; CAPRIN2; CC2D1A; CCDC71L;…
hsa-miR-378c	ALS2; ARL10; ATG12; BCL2L2; BMP2; CAMKK2; CD226; CDC20B; CHIT1; CREBRF; DACT1; DCX; EIF4G3; FAM179B; FOXG1; GOLT1A; GRB2; GRSF1; H3F3B; HDDC2; HNRNPA1; IL6ST; IMPG1; IPO9; IRG1; KCND1; KDSR; KIAA1429; KIAA1522; KIF2A; LENG9; MAPK1; MED19; METTL4; MROH8; NEUROD1; NPAS4; PAPD5; PDIA4; PEF1; PHF7; PIWIL2; RAB10; RBMS1; RIT1; RSPH4A; SBDS; SDAD1; SERINC1; SGCZ; SKP2; TMED7-TICAM2; TOB2; TRAF3; TSPAN1…
hsa-miR-125a-5p	ABCC5; ABHD3; ABHD6; ABTB1; ACER2; ACHE; ACSL6; ADAM9; ADAMTS14; AGGF1; AIFM1; AKAP1; AKT1S1; ALDH1A3; ANKRD44; ANO6; ANPEP; APC; APOC4; ARCN1; ARID3B; ARSI; ASB4; ATL2; ATP10D; B3GALNT2; BAK1; BAP1; BCAT1; BCL2L12; BCL2L2; BDH1; BIN2; BLZF1; BMF; BRPF1; BRWD1; BTN2A2; C11orf57; C15orf39; C17orf59; C19orf38; C19orf54; C1orf109; C1orf210; C4orf19; C6orf47; C7orf26; CACNB3; CASP2; CBFB; CCDC71L; CC…
hsa-miR-18a-5p	ABTB2; ADD3; AEBP2; ALCAM; AMIGO1; ASXL2; ATP13A1; ATXN1L; ATXN2L; BBX; BEND3; BHLHE22; BMP2K; BRWD3; BTG3; C5orf30; C9orf114; CACNB3; CADM2; CAMK2N1; CCND2; CDC42; CDK14; CDK19; CDK2; CHRM2; CLIP3; CNTNAP1; CREBL2; CRIM1; CSRNP3; CTDSPL; CTGF; DAAM2; DDI2; DIP2C; DIRAS2; ENC1; ERBB2; ERI1; ESR1; ETV6; EXPH5; F3; FAM196B; FAM229B; FAM3C; FAM73A; FBXL3; FCHSD2; FER; FNDC3B; FOXH1; FRS2; FRYL; GCLC…
hsa-miR-4664-3p	-
hsa-miR-378d	ALS2; ARL10; ATG12; BCL2L2; BMP2; CAMKK2; CD226; CDC20B; CHIT1; CREBRF; DACT1; DCX; EIF4G3; FAM179B; FOXG1; GOLT1A; GRB2; GRSF1; H3F3B; HDDC2; HNRNPA1; IL6ST; IMPG1; IPO9; IRG1; KCND1; KDSR; KIAA1429; KIAA1522; KIF2A; LENG9; MAPK1; MED19; METTL4; MROH8; NEUROD1; NPAS4; PAPD5; PDIA4; PEF1; PHF7; PIWIL2; RAB10; RBMS1; RIT1; RSPH4A; SBDS; SDAD1; SERINC1; SGCZ; SKP2; TMED7-TICAM2; TOB2; TRAF3; TSPAN1…
hsa-miR-202-5p	ACTN1; ARF6; ASZ1; ATP5E; BCL2; BEND6; C17orf75; CDC123; CDK14; COIL; COX10; CUEDC1; ECHDC1; EIF4E; FAM60A; GID8; GSKIP; GTF3C2; HES5; HNRNPR; HOXB2; INSIG1; KIAA1715; KRAS; LBR; LHFPL3; MARCH1; MARCKS; MATN2; MED15; METRNL; NR2F2; NUDCD2; PAN3; PARM1; PARN; PCGF2; PFN2; PIK3CA; PLEKHA1; PLEKHF2; PTPN3; RNF11; RNF121; ROCK1; SCLY; SLC38A4; SRSF4; TANGO2; TGFBR1; TMPRSS11D; TOX4; TSPAN12; UBE2K; U…
hsa-miR-1-3p	ABCB7; ABHD2; ACER2; ACTB; ADAM12; ADPGK; AKAP11; AKAP12; ANKRD29; ANKRD34B; ANP32B; ANP32E; ANXA2; ANXA4; AP1S1; ARCN1; ARFIP1; ARG2; ARHGAP21; ARID2; ARPC3; ASH2L; ASPH; ATG13; ATP6V1A; AXL; AZIN1; BACH2; BAG4; BDNF; BET1; BLCAP; BPNT1; BRI3BP; BSCL2; C10orf126; C16orf47; C1GALT1; C2CD5; C2orf69; C5orf51; C7orf43; C9orf152; CAAP1; CALM2; CAPZA1; CASK; CBL; CCNC; CCSAP; CD164; CDC42; CDC42SE1; C…
hsa-miR-106b-5p	ABHD2; ABHD5; ACER2; ADAM9; AGFG2; AHNAK; AKTIP; AMER2; ANKRD50; ANKRD9; ANO6; APCDD1; APP; ARAP2; ARHGAP1; ARHGAP12; ARHGEF10; ARHGEF28; ARHGEF3; ARID4A; ARID4B; ARL4C; ATAD2; ATE1; ATG16L1; B3GALT2; B4GALT6; BAHD1; BAMBI; BHLHE41; BMPR2; BNC2; BRMS1L; BTBD10; BTBD7; BTG3; BVES; C10orf107; C11orf30; C16orf52; C2orf69; C6orf120; C7orf43; C7orf60; CALD1; CAMK2N1; CAMK2N2; CAPRIN2; CC2D1A; CCDC25; …
hsa-miR-17-5p	ABHD5; ACER2; ADAM9; AEN; AGFG2; AHNAK; AKTIP; AMER2; ANKRD13C; ANKRD50; ANKRD9; ANO6; APCDD1; APP; ARAP2; ARHGAP1; ARHGAP12; ARHGEF10; ARHGEF28; ARHGEF3; ARID4A; ARID4B; ARL4C; ATAD2; ATE1; ATG16L1; ATG2B; ATP1A2; B3GALT2; B4GALT6; BAHD1; BAMBI; BICC1; BMPR2; BRMS1L; BTBD10; BTBD7; BTG3; BVES; C10orf107; C11orf30; C16orf52; C2orf69; C6orf120; C7orf43; C7orf60; CALD1; CAMK2N1; CAMK2N2; CAPRIN2; C…
hsa-miR-105-5p	-
hsa-miR-224-5p	ADAM17; ARMCX2; ASS1; ATP1B3; AZIN1; C1orf52; CCDC117; CCDC178; CCDC28B; CDS2; CORO1C; CPNE8; CSTF2; CYP24A1; DUSP11; EGR2; EIF1AX; F2RL1; FAM49B; FGB; FRMD8; GDF11; GGNBP2; GNAI3; GPC4; GPM6A; GPR180; GTSF1; H3F3B; HMOX2; HNRNPU; HOXA5; IL1RN; INIP; ISM1; ITM2B; KDELR1; KLLN; LYPLA1; MINPP1; NAP1L1; NOTUM; NR4A1; NUAK1; PANX1; PDCL; PHOX2B; POGZ; PRDX3; PSPC1; PTX3; RBM10; RBM33; RNF11; RNF144B;…
hsa-miR-431-5p	AKAP1; ALG8; ANKH; ATP6V0E1; BTBD1; BTF3L4; C11orf44; C17orf85; C1orf94; CA1; CCSAP; CD34; CDPF1; CELF2; CEP72; CHODL; CHST2; CLTC; DIRAS2; DLX3; EPB41L1; FADS6; FAM65B; FPGT; GATA6; HIPK3; LHX8; LYPD6; NETO1; NKX6-1; NR3C2; NRG2; NRXN3; PBOV1; PITPNA; RBBP9; RBPMS; RPS15A; SERTM1; SLC35B3; SMARCA5; SOCS6; SORCS1; SPATA8; STT3B; STX5; TBC1D10C; TCF7L1; TMEM200B; TRIM39; UBE2D1; ZBED3; ZNF280C;
hsa-miR-181b-5p	ACTA2; ADAMTS5; ADO; ADRA1A; AFTPH; AKIRIN1; ANKRD13C; AP1AR; AP1S3; APOO; ARF6; ARL1; ARL5A; ARSJ; ASAH2B; ATP1B1; BAG4; BCL2; BCL2L11; BHLHE40; BLOC1S6; BRD1; BTBD3; C16orf87; C2CD5; C2orf69; CALM1; CALR; CARD11; CBLB; CBX4; CBX7; CCAR1; CCL8; CCNJ; CD69; CDON; CLASP1; CLVS1; COL16A1; CPNE2; CPOX; CREBRF; CRIM1; CUL4A; DDIT4; DDX52; DEK; DEPTOR; DERL1; DNAJA4; DNAJC13; DOCK7; DUSP10; DUSP6; E2F…
hsa-miR-345-5p	-
hsa-miR-877-5p	CDC40; EID1; ELF1; FAM167A; FOXM1; FXR2; HAND2; HOXB8; HSD11B1; ISX; KLHL18; KRAS; KRTAP4-9; LPCAT2; ORAI1; PDPN; PLEKHA3; RFTN2; SLCO3A1; SORBS3; TMCC2; TMED7; TP53INP2; WISP2; YLPM1; ZNF174;
hsa-miR-133b	ABCD2; ADRA2B; AFAP1; AFTPH; AGRP; AKAP9; ANKRD12; ANKRD28; ANKRD44; ANKRD46; AOX1; AP1AR; AP1B1; AP2M1; AP4E1; AQP1; ARFIP2; ARHGAP12; ARHGAP9; ARL3; ARPC5; ARPP21; ASH1L; ATOX1; ATP6AP2; B3GALNT1; B3GNT2; B3GNT9; BCL2L1; BCL2L2; BCORL1; BICC1; BTBD3; C12orf43; C1QL1; C20orf194; CACUL1; CAP1; CAPN15; CASC3; CCDC117; CCDC176; CDCA8; CDIP1; CDK13; CECR6; CELF1; CELF4; CELF6; CEP85L; CERS2; CETN3; …
hsa-miR-135b-5p	ABCE1; ACTR3B; ACVR1B; ADARB2; ADCYAP1; ADO; ADRA2A; AEBP2; ALPK1; ANGPT2; ANGPTL2; ANKRD40; ANKRD55; ANO4; ANP32E; ANXA7; AP1G2; APC; APLF; APMAP; ARC; AREL1; ARHGAP11A; ARHGAP6; ARHGEF2; ARHGEF4; ARHGEF6; ARL9; ARNTL; ASPH; ATP1B1; ATP6V1C2; B4GALT5; BACH1; BCAT1; BMPER; BMPR1A; BNIP2; BTBD10; BZW2; C14orf166; C16orf52; C18orf54; C1orf198; C3orf80; C6orf106; C6orf120; CACNA1D; CADM3; CADM4; CAM…
hsa-miR-15b-5p	A4GNT; ABCF1; ABL2; ACOX1; ACTR2; ACVR2A; ACVR2B; ADAMTS3; ADAMTS5; ADAMTSL3; ADAP1; ADRB2; AEBP2; AGO4; AIFM1; AK4; AKAP12; AKT3; ALAD; ALOX12; AMIGO1; AMIGO3; AMMECR1; AMOTL1; ANKIB1; ANKRD13B; ANLN; ANO3; ANXA11; AOC1; AP2A1; AP2B1; APLN; APP; AQP11; ARFGAP2; ARHGAP18; ARHGDIA; ARL2; ARL3; ARMC12; ARMCX2; ARPP19; ASH1L; ATG9A; ATP7A; ATXN1L; ATXN2; ATXN7L1; ATXN7L3; AXIN2; B4GALT1; BACE1; BAG5…
hsa-miR-20a-5p	ABHD2; ABHD5; ACER2; ADAM9; AEN; AGFG2; AHNAK; AKTIP; AMER2; ANKRD50; ANKRD9; ANO6; APCDD1; APP; ARAP2; ARHGAP1; ARHGAP12; ARHGEF10; ARHGEF28; ARHGEF3; ARID4A; ARID4B; ARL4C; ATAD2; ATE1; ATG16L1; B3GALT2; B4GALT6; BAHD1; BAMBI; BHLHE41; BMPR2; BRMS1L; BTBD10; BTBD7; BTG3; BVES; C10orf107; C11orf30; C16orf52; C2orf69; C6orf120; C7orf43; C7orf60; CALD1; CAMK2N1; CAMK2N2; CAPRIN2; CC2D1A; CCDC25; C…
hsa-miR-375	ATP1B1; C19orf44; C8orf86; CEPT1; DESI1; EIF4G3; ELAVL4; HNF1B; IFT20; ISL2; KCNE3; LRP5; POU3F1; SLC16A2; TMEM55A; USPL1; YBX1;
hsa-miR-29c-5p	-
hsa-miR-30e-3p	-
hsa-miR-30a-3p	-
hsa-miR-145-3p	-
hsa-miR-195-3p	UBE2B; UBE2I;
hsa-miR-153-5p	-
hsa-miR-664a-3p	-
hsa-miR-5680	-
hsa-miR-181b-3p	-
hsa-miR-4746-5p	-
hsa-miR-181a-3p	-
hsa-miR-21-3p	-
hsa-miR-93-3p	-
hsa-miR-15b-3p	-
hsa-miR-204-3p	-
hsa-miR-4652-5p	-
hsa-miR-1468-5p	-
hsa-miR-106b-3p	-
hsa-miR-148a-5p	-
hsa-miR-767-5p	-
hsa-miR-18a-3p	-
hsa-miR-16-2-3p	UBE2B; UBE2I;
hsa-miR-133a-5p	-
hsa-miR-139-3p	-
hsa-miR-335-3p	-
hsa-miR-490-5p	-
hsa-miR-30c-2-3p	-
hsa-miR-628-3p	-
hsa-miR-937-3p	-
hsa-miR-1180-3p	-
hsa-miR-636	-
hsa-miR-940	-
hsa-miR-301a-5p	-
